# Supplementary material for: Crystal structure of human Acinus RNA recognition motif domain
Source: PeerJ journal article supplement (doi:10.7717/peerj.5163), 2018-07-04
Supplement: Fig4s.pdf [file Fig4s.pdf]

|                       | 1008 | 1020       | 1030                  | 1040          | 1050           | 1060      | 1070                 | 1080 | 1090                    | 1098 |
|-----------------------|------|------------|-----------------------|---------------|----------------|-----------|----------------------|------|-------------------------|------|
| Q9UKV3_1008_1098      |      | GKISNIVHI  | SNLVRPFTLGQLKELLG-RTG | -----T-L-V-EE | -AFWIDKIKSHCFV | -----TYS  | TVVEEAVATRALHGVK-WPQ | ---- | SNPKFLCADYAEQDELDFHRL   |      |
| H9GCG6_903_993        |      | GKVGNIIVHI | CNLVRPFTLGQLKELLG-RTG | -----T-L-V-EE | -AFWIDKIKSHCFV | -----TYS  | TVVEEAVATRALHGVK-WPQ | ---- | SNPKFLSADFAEQDELDFHRL   |      |
| UPI00072E54CB_1006_10 |      | GKISNIVHI  | SNLVRPFTLGQLKELLG-RTG | -----T-L-V-EE | -AFWIDKIKSHCFV | -----TYS  | TVVEEAVATRALHGVK-WPQ | ---- | SNPKFLCADYAEQDEERKLR--- |      |
| UPI0006B177FE_105_195 |      | GKISCVHI   | CNLVRPFTLGQLKELLG-RTG | -----T-L-V-EE | -AFWIDKIKSHCFV | -----TYS  | TVVEEAVATRALHGVK-WPQ | ---- | SNPKFLSADFAEQDELDFHRL   |      |
| AOA0P7WSH2_279_369    |      | GKITNIVHI  | CNLVRPFTLGQLKELLN-RTG | -----T-V-V-EE | -GFWIDKIKSHCFV | -----TYS  | STEEAVATRALHGVK-WPQ  | ---- | SNPKFLSVDVSEQDELDFHRL   |      |
| F1C7H3_22_112         |      | GKVSNIIVHI | SNLVRPFTLGQLKELLG-RTG | -----T-L-V-EE | -GFWIDKIKSHCFV | -----TYS  | SSEEAVATRALHGVK-WPQ  | ---- | SNPKVLNVDFCQQDELDFHRL   |      |
| UPI000644135A_441_530 |      | -KVSNIHI   | SNLVRPFTLGQLKELLH-RTG | -----T-V-L-EE | -SFWIDKIKSHCFV | -----TYAS | VVEAVATRALHGVK-WPQ   | ---- | SNPKFLSVDVSEQDELDFHRL   |      |
| AOA151NQ65_453_542    |      | -KPSHIVHI  | CNLVRPFTLGQLKELLS-RTG | -----T-L-V-EE | -GFWIDKIKSHCFV | -----TYS  | TLEEAVLTRNSLHGVK-WPQ | ---- | SNPKFLSADFAEQDELDFHRL   |      |
| H2M9R2_962_1052       |      | GKVSNIIVHI | CNLVRPFTLGQLKELLS-RTG | -----T-L-V-ED | -GFWIDKIKSHCFV | -----TYS  | SVEEAVATRALHGVK-WPQ  | ---- | SNPKVLSVDVFCQQDELDFHRL  |      |
| UPI00085413F7_262_350 |      | --PSCIVHV  | CNLVRPFTLGQLKELLS-RTG | -----T-L-V-EE | -NFWIDKIKSHCFV | -----TYS  | TLEEATATRNSLHGVK-WPQ | ---- | SNPKFLSVDFAEQDELDFHRL   |      |
| AOA1S3R3X4_1731_1821  |      | GKVSNIIVHI | SNLVRPFTLGQLKELLS-RTG | -----T-V-L-ED | -GFWIDKIKSHCFV | -----TYS  | SAAEAVATRALHGVK-WPQ  | ---- | SNPKFLSVDVSEQDELDFHRL   |      |
| UPI000814A1FB_1213_13 |      | GKVSNIIVHV | CNLVRPFTLGQLKELLN-RTG | -----T-I-V-EE | -GFWIDKIKSHCFV | -----TYS  | SAAEQATRALHGVK-WPQ   | ---- | SNPKFLNVDFCQQDELDFHRL   |      |
| UPI0007AD4283_1397_14 |      | GKLSNIIVHV | CNLVRPFTLGQLKELLN-RTG | -----T-V-V-EE | -GFWIDKIKSHCFV | -----TYS  | SAAEAMATRALHGVK-WPQ  | ---- | SNPKFLSVDVFCQQDELDFHRL  |      |
| H3B6Z2_916_1006       |      | GKVTIIVHI  | CNLVRPFTLGQLKELLN-RTG | -----T-L-I-EE | -TFWIDKIKSHCFV | -----TYS  | SVEEAVATRALHGVK-WPQ  | ---- | SNPKLLTVDFAEQDELDFHRL   |      |
| UPI00084D6AB9_1751_18 |      | -KISCIVHI  | CNLVRPFTLGQLKELLS-RSG | -----T-I-V-EE | -NFWIDKIKSHCFV | -----TYS  | TVEEAVATRNSLHGVK-WPQ | ---- | SNPKFLSVDFAEQDELDFHRL   |      |
| UPI0006B38F76_1730_18 |      | GKVSNIIVHV | CNLVRPFTLGQLKELLS-RTG | -----T-L-V-ED | -GFWIDKIKSHCFV | -----TYS  | SCIEEAVATRALHGVK-WPQ | ---- | SNPKVLRVDVFCQQDELDFHRL  |      |
| UPI00094EB2C0_1367_14 |      | GKVSNIIVHI | SNLVRPFTLGQLKELLG-RTG | -----T-L-V-ED | -GFWIDKIKSHCFV | -----TYS  | SSEEAATRALHGVK-WPQ   | ---- | SNPKVLNVDFCQQDELDFHRL   |      |
| AOA1A7WMS9_756_846    |      | GKVSNIIVHI | CNLVRPFTLGQLKELLG-RTG | -----T-L-V-DN | -GFWIDKIKSHCFV | -----TYS  | SDEAVATRALHGVK-WPQ   | ---- | SNPKVLRVDVFCQQDELDFHRL  |      |
| UPI00099F6FAC_220_310 |      | GKVSNIIVHV | SNLVRPFTLGQLKELLG-RTG | -----T-V-H-ED | -GFWIDKIKSHCFV | -----TYS  | SAESIATRALHGVK-WPQ   | ---- | SNPKFLSDFIQDELDFHRL     |      |
| AOA1W5AKJ0_1350_1440  |      | GNTIIVHI   | CNLVRPFTLGQLKELLN-RTG | -----A-M-L-EE | -GFWIDKIKSHCFV | -----TYP  | STEEAVATRALHGVK-WPQ  | ---- | SNPKFLNVDFCQQDELDFHRL   |      |
| UPI0004952D10_1422_15 |      | GKVSNIIVHV | CNLVRPFTLGQLKELLS-RTG | -----T-L-V-EE | -GFWIDKIKSHCFV | -----TYS  | SIEEAVATRALHGVK-WPQ  | ---- | SNPKVLSVDVFCQQDELDFHRL  |      |
| UPI0008F9EFBA_230_320 |      | GKTSNIIVHI | YNLVRPFTLGQLKELLN-RTG | -----K-L-V-EE | -GFWIDKIKSHCFV | -----TYS  | TVEEAVATRALHGVK-WPT  | ---- | SNPKVLRVDVFCQQDELDFHRL  |      |
| AOA1S3N950_1104_1194  |      | GKVSNIIVHV | CNLVRPFTLGQLKELLN-RTG | -----S-V-V-EE | -GFWIDKIKSHCFV | -----TYS  | STEEAVATRALHGVK-WPQ  | ---- | SNPKVLRVDVFCQQDELDFHRL  |      |
| UPI0009734431_1428_15 |      | GKVSNIIVHI | SNLVRPFTLGQLKELLS-RTG | -----T-M-L-EE | -GFWIDKIKSHCFV | -----TYG  | CTEEAVATRALHGVK-WPQ  | ---- | SNPKVLSVDVFCQQDELDFHRL  |      |
| UPI00097CEA79_1433_15 |      | GKVSNIIVHV | CNLVRPFTLGQLKELLS-RTG | -----T-L-V-ED | -SFWIDKIKSHCFV | -----TYS  | CSSEAVATRALHGVK-WPQ  | ---- | SNPKVLSVDVFCQQDELDFHRL  |      |
| UPI0009B26987_991_108 |      | GKVSNIIVHI | TNLVRPFTLGQLKELLN-RTG | -----S-L-L-EE | -GFWIDKIKSHCFV | -----TYA  | TTEEAVATRALHGVK-WPQ  | ---- | SNPKVLRVDVFCQQDELDFHRL  |      |
| UPI0007429D9E_837_927 |      | GKISNIIVHI | TNLVRPFTLGQLKELLN-RTG | -----T-V-V-EE | -GFWIDKIKSHCFV | -----TYT  | TTEEAVATRALHGVK-WPA  | ---- | SNPKVLSVDVFCQQDELDFHRL  |      |
| UPI000874C358_882_972 |      | GKVSNIIVHI | TNLVRPFTLGQLKELLN-RTG | -----T-M-V-ED | -GFWIDKIKSHCFV | -----TYA  | TTEEAVATRALHGVK-WPP  | ---- | SNPKVLRVDVFCQQDELDFHRL  |      |
| UPI000329F967_1332_14 |      | GKVSTIIVHI | CNLVRPFTLGQLKELLS-RTG | -----S-L-M-EE | -GFWIDKIKSHCFV | -----TYS  | SVEEAVATRALHGVK-WPQ  | ---- | SNPKVLRVDVFCQQDELDFHRL  |      |
| UPI00097DD28A_873_963 |      | GKISNIIVHI | TNLVRPFTLGQLKELLN-RTG | -----T-V-V-EE | -GFWIDKIKSHCFV | -----TYA  | TTEEAVATRALHGVK-WPS  | ---- | SNPKVLSVDVFCQQDELDFHRL  |      |
| UPI000B3CDADE_8_95    |      | ---TNIVHI  | CNLVRPFTLGQLKELLG-RTG | -----T-L-R-ED | -GFWIDKIKSHCFV | -----TYAS | VVEEAATRALHGVK-WPQ   | ---- | SNPKVLAADFAEQDELDFHRL   |      |
| G3PLU1_930_1020       |      | GKVSNIIVHI | SNLVRPFTLGQLKELLS-RTG | -----T-L-L-EE | -GFWIDKIKSHCFV | -----TYS  | CPPEAVATRALHGVK-WPQ  | ---- | SNPKVLRVDVFCQQDELDFHRL  |      |
| M7B0L8_1113_1201      |      | -KPSPIVHI  | CNLVRPFTLGQLKELLG-RTG | -----T-L-V-EE | -AFWIDKIKSHCFV | -----TYS  | TVEEAVLTRNSLHGVK-WPQ | ---- | SNPKFLSADFAEQDELDFHRL   |      |
| Q4S0T2_201_291        |      | GKLSNIIVHI | TNLVRPFTLGQLKELLN-RTG | -----T-V-V-EE | -GFWIDKIKSHCFV | -----TYA  | TTEEAATRALHGVK-WPQ   | ---- | SNPKVLRVDVFCQQDELDFHRL  |      |
| UPI000900FFC4_1389_14 |      | GKVSNIIVHI | SNLVRPFTLGQLKELLS-RTG | -----T-L-V-EE | -GFWIDKIKSHCFV | -----TYS  | CSDEAVATRALHGVK-WPQ  | ---- | SNPKVLSVDVFCQQDELDFHRL  |      |
| UPI000BBD5ECE_1275_13 |      | GKISNIIVHV | CNLVRPFTLGQLKELLS-RTG | -----T-I-V-EE | -DFWIDKIKSHCFV | -----SYS  | SLEEATRALHGVK-WPQ    | ---- | SNPKFLSVDVFCQQDELDFHRL  |      |
| UPI00077D03B4_1331_14 |      | GKVSNIIVHI | CNLVRPFTLGQLKELLG-RTG | -----T-L-L-ND | -GFWIDKIKSHCFV | -----TYS  | SSEAVATRALHGVK-WPQ   | ---- | SNPKVLRVDVFCQQDELDFHRL  |      |
| UPI000661C41E_2269_23 |      | GKLSNIIVHV | CNLVRPFTLGQLKELLN-RTG | -----T-V-V-ED | -GFWIDKIKSHCFV | -----TYS  | STEEAVATRALHGVK-WPQ  | ---- | SNPKVLSVDVFCQQDELDFHRL  |      |
| H2SL09_969_1059       |      | GKVSNIIVHI | SNLVRPFTLGQLKELLS-RTG | -----S-L-V-EE | -GFWIDKIKSHCFV | -----TYS  | CSSEAVATRALHGVK-WPQ  | ---- | SNPKVLRVDVFCQQDELDFHRL  |      |
| V9KUF8_400_490        |      | GKVSPIIVHI | CNLVRPFTLGQLKELLH-RTG | -----S-L-L-EE | -GFWIDKIKSHCFV | -----TYS  | SVEEAVATRNSLHGVK-WPT | ---- | SNPKFLSVDVFCQQDELDFHRL  |      |
| UPI000BBDEC61_1001_10 |      | GKISNIIVHI | CNLVRPFTLGQLKELLN-RTG | -----T-V-L-EE | -GFWIDKIKSHCFV | -----TYS  | SKEEAVATRALHGVK-WPS  | ---- | SNPKVLRVDVFCQQDELDFHRL  |      |
| UPI0007F93678_849_939 |      | GKVSNIIVHI | TNLVRPFTLGQLKELLN-RTG | -----S-V-V-EE | -GFWIDKIKSHCFV | -----TYA  | TSEEAVATRALHGVK-WPA  | ---- | SNPKVLSVDVFCQQDELDFHRL  |      |
| M3ZHA8_949_1039       |      | GKVSNIIVHI | TNLVRPFTLGQLKELLN-RTG | -----S-V-V-EE | -GFWIDKIKSHCFV | -----TYT  | TTEEAVATRALHGVK-WPP  | ---- | SNPKVLRVDVFCQQDELDFHRL  |      |
| UPI000A1C471E_206_296 |      | GKVSNIIVHI | TNLVRPFTLGQLKELLS-RTG | -----S-V-V-ED | -GFWIDKIKSHCFV | -----TYS  | TTEEAVATRALHGVK-WPQ  | ---- | SNPKVLSVDVFCQQDELDFHRL  |      |
| UPI0009B495BE_1341_14 |      | GKVSNIIVHI | CNLVRPFTLGQLKELLS-RTG | -----I-L-V-EE | -GFWIDKIKSHCFV | -----TYS  | SSEAVATRALHGVK-WPQ   | ---- | SNPKVLSVDVFCQQDELDFHRL  |      |
| UPI0007B92203_913_100 |      | GKTSNIIVHI | CNLVRPFTLGQLKELLN-RTG | -----T-L-V-EE | -GFWIDKIKSHCFV | -----TYS  | TIEEAVATRALHGVK-WPT  | ---- | SNPKVLRVDVFCQQDELDFHRL  |      |
| UPI000496A047_876_966 |      | GKISNIIVHI | TNLVRPFTLGQLKELLN-RTG | -----S-V-V-EE | -GFWIDKIKSHCFV | -----TYA  | TSEEAVATRALHGVK-WPP  | ---- | SNPKVLSVDVFCQQDELDFHRL  |      |
| UPI0002A4A609_812_902 |      | GKVSNIIVHV | TNLVRPFTLGQLKELLN-RTG | -----T-M-V-EE | -GFWIDKIKSHCFV | -----TYS  | ATEEAVATRALHGVK-WPP  | ---- | SNPKVLRVDVFCQQDELDFHRL  |      |
| UPI0009B34807_858_946 |      | GKVSNIIVHI | TNLVRPFTLGQLKELLS-RTG | -----S-V-V-EE | -GFWIDKIKSHCFV | -----TYA  | TTEEAVATRALHGVK-WPQ  | ---- | SNPKVLRVDVFCQQDELDFHRL  |      |
| UPI000B8F92B5_912_100 |      | GKVSNIIVHI | TNLVRPFTLGQLKELLN-RTG | -----S-V-V-EE | -GFWIDKIKSHCFV | -----TYA  | TSEEATRALHGVK-WPT    | ---- | SNPKVLRVDVFCQQDELDFHRL  |      |
| UPI0009048405_842_932 |      | GKVSNIIVHI | TNLVRPFTLGQLKELLN-RTG | -----S-V-V-EE | -GFWIDKIKSHCFV | -----TYA  | TDEAVATRALHGVK-WPT   | ---- | SNPKVLRVDVFCQQDELDFHRL  |      |
| UPI000814B190_958_104 |      | GKVSNIIVHI | CNLVRPFTLGQLKELLN-RTG | -----T-V-V-EE | -SFWIDKIKSHCFV | -----TYS  | SKEEAVATRALHGVK-WPS  | ---- | SNPKVLRVDVFCQQDELDFHRL  |      |
| UPI00094EC2C1_747_837 |      | GKLSNIIVHV | TNLVRPFTLGQLKELLN-RTG | -----S-M-V-ED | -GFWIDKIKSHCFV | -----TYT  | TTEEAATRESLHGVK-WPQ  | ---- | SNPKVLSVDVFCQQDELDFHRL  |      |
| F1Q511_909_999        |      | GKTSNIIVHI | LHLVRPFTLGQLKELLN-RTG | -----T-M-V-EE | -GFWIDKIKSHCFV | -----TYS  | TVEEAVATRALHGVK-WPA  | ---- | SNPKVLRVDVFCQQDELDFHRL  |      |
| UPI0006B3A046_497_587 |      | GKVSNIIVHI | TNLVRPFTLGQLKELLN-RTG | -----S-V-V-EE | -GFWIDKIKSHCFV | -----TYT  | TTEEAVATRALHGVK-WPA  | ---- | SNPKVLRVDVFCQQDELDFHRL  |      |
| UPI000554C5C1_263_353 |      | GKVSTIIVHI | TNLVRPFTLGQLKELLN-RTG | -----S-V-L-ED | -CFWIDKIKSHCFV | -----TYG  | TTEEAVATRALHGVK-WPS  | ---- | SNPKVLRVDVFCQQDELDFHRL  |      |
| UPI0007DC9524_1329_14 |      | GKVSNIIVHV | CNLVRPFTLGQLKELLS-RTG | -----T-L-V-DD | -GFWIDKIKSHCFV | -----TYS  | SSEAVATRALHGVK-WPQ   | ---- | SNPKVLSVDVFCQQDELDFHRL  |      |
| H2TAD9_889_979        |      | GKLSNIIVHI | TNLVRPFTLGQLKELLN-RTG | -----T-M-V-EE | -GFWIDKIKSHCFV | -----TYA  | TTEEAVATRALHGVK-WPL  | ---- | SNPKVLSVDVFCQQDELDFHRL  |      |

1008                    1020                    1030                    1040                    1050                    1060                    1070                    . \*                    1080                    1090                    1098  
 UPI00072EE877\_1255\_13 GQVSSIVHINLVNLRPFTLQQLKELLS-RTG-----T-L-V-ED-GFWIDKIKSHCYV-----TYSSEAEAVATRAALHGVR-WPQ--SNPKVLRVDFCQQDDELQYQR--  
 UPI0007429473\_1298\_13 GQASNIVHINLVNLRPFTLQQLKELLS-RTG-----T-L-V-ED-GFWINKIKSHCYV-----TYSITEEAVATQALHGVR-WPQ--SNPKFLRVDFCQQEELDFHQR--  
 UPI000496F436\_263\_353 GQISKIIVHTNLVLRPFTLQQLKELLN-RTG-----S-V-L-ED-GFWIDKIKSHCYV-----TYATTEEAVSTRNALHGVR-WFS--SNPKVLSVDFCQQEELDFHGRGI  
 A0A1A8E557\_207\_297 GKVSNIIHVNLVLRPFTLQQLKELLN-RTG-----S-V-V-EE-GFWIDKIKSHCYV-----TYASTEAVSTRNALHGVR-WFA--SNPKVLSVDFCQKQAEELDFHKGII  
 UPI00064418ED\_927\_101 GKVSKIIHVNLVLRPFTLQQLKELLS-RTG-----A-V-V-EE-GFWIDKIKSHCYV-----TYSSTEAVATRALHGVR-WFL--SNPKVINVDVFEQEEELDFQKGL  
 UPI000802B86F\_967\_105 GKTSNIIHVNLVLRPFTLQQLKELLN-RTG-----A-V-V-ED-GFWIDKIKSHCYV-----TYASTEAVATRALHGVR-WFS--SNPKVLRVDFCEQKELDFHKKVL  
 A0A0F8C817\_928\_1017 -KISNIIHVNLVLRPFTLQQLKELLK-RTG-----V-V-M-EE-GFWIDKIKSHCFV-----TYTTTKEAFASRAALHGVR-WPQ--SNPKVLSVEFCEQAEELDFHKKV  
 UPI0006B7CC38\_120\_203 ---SPGVPVPFTLQQLKELLG-RTG-----R-L-K-DD-GFWIDRIKSHCFV-----TYCSVEEAVATRALHGVR-WPQ--SNPKVLAADFQQEELDFHGRGL  
 UPI0003F0DCE1\_713\_801 ---VTKIVHVMNLVLRPFTLQQLKELLS-RSG-----T-I-V-EE-GFWIDKIKSHCFV-----TYSVEEAAIKTRDALHGVR-WFS--SNPKNLIIVEYAVQEEIDRHKKGV  
 UPI000948218F\_837\_925 ---VSQIVHILHLVLRPFTLQQLKELLG-RTG-----T-I-V-EDK-GFWIDKIKSHCFV-----KYESEEEAVKTRQALHGVR-WFS--SNPKTLVDFADQDELDIHLG-  
 A0A0L8GBT8\_657\_744 ---VSKIVHVRNLVLRPFTLQQLKELLK-RTG-----A-V-V-EN-GFWIDKIKSHCFV-----KYETEQAAILTRKALHGVR-WFS--SNPKILRVEYATDDEVSYRS-  
 UPI000719AFA5\_609\_695 ---STLVHVRNLVLRPFTLQQLKELLG-RSG-----K-L-V-DS-SFWIDKIKSHCFV-----EFETVDEAMALRADHGVR-WFS--SNPKVIRVDFTEPAELDFHRE-  
 UPI000BAF2231\_796\_880 ---VSNIIHVRNLVLRPFTLQQLKELLK-RTG-----N-L-V-DD-GFWIDRIKSHCFV-----TYNEEGAATRALHGVR-WPQ--SNPKILRVEYATKDELDLDR---  
 K1QEG1\_472\_556 ---VSNIIHVRNLVLRPFTLQQLKELLK-RTG-----S-L-V-EE-SFWIDRIKSHCFV-----TYNEEQATATRASLHGVR-WPQ--SNPKILKVEYASKDELELDR---  
 A0A1S3J0R6\_705\_791 ---VSKIVHVTGLVLRPFTLQQLKELLG-QTG-----T-L-V-ED-GFWIDRIKSHCFV-----TFETEQAQKTRQALHGVR-WFL--SNPKTLRVDFADELELSFHK-  
 T1JN81\_147\_234 ---VNRIVHVRNLVLRPFTLQQLKELLG-RTG-----T-L-V-DG-GFWIDRIKSHCFV-----TYEQEQAMKTRQALHGVR-WPP--SNPKLIVDFADDELELDFHMS-  
 UPI0009E51C95\_603\_684 ---SEVLHVKNLVRPFTLQQLKELLG-KHG-----T-L-V-EG-GFWIDKIKSHCFV-----VYSVVEEAAACRALHGVR-WPQ--TSPKILVDFADQDELELDR---  
 A0A210PFD3\_828\_914 ---VSKIIHVNRNLVLRPFTLQQLKELLR-RTG-----N-I-V-EN-EFWIDKIKSHCFV-----TYETEENAVQTRKALHGVR-WFS--SNPKLLWLEFASPEEIEFNK-  
 UPI00077FA035\_1613\_17 GPISKIVFQNLVLRPFTLQQLKELLR-QTG-----N-F-I-ED-DFWIDKIKSHCFV-----TYTTEEAAIKTRNALHGVR-WFS--SNPKILSVEFASPEEIEFHRR-  
 UPI000B90D3B4\_803\_890 ---SAVVHVNLVLRPFTLQQLKELLG-RSG-----Q-LEA-ED-GFWIDRIKSHCFV-----VFTSVEEAVACRDLHGVR-WFS--SNPKMLRVDFASKDELDRLTKG-  
 T1KU57\_15\_103 -KTSNIIHVRNLVLRPFTLQQLKELLE-KNG-----K-L-V-ED-QFWIDKIKSHCFV-----TYTEEDAINTRALHGVR-WPQ--ANPKLIVDFATKDELELDRHLN-  
 A0A067RGG4\_866\_953 -KASNVLFIHNLVLRPFTLQQLKELLA-RTG-----N-I-V-EG-GFWIDKIKSHCFV-----QYETEETARETRHALHGVR-WPQ--SNPKQLVDFGKKEDEMDLAQ-  
 UPI0006B0997C\_1566\_16 ---SNIIHVRNLVLRPFTLQQLKELLA-KTG-----T-L-V-DG-GFWIDKIKSHCFV-----TYETEQAQKTRQALHGVR-WPQ--SNPKTLVDFATKDELELDRHLN-  
 F6LVT0\_57\_143 ---SKILHVMNLVLRPFTLQQLKELLG-RFG-----T-L-A-EE-GFWIDRIKSHCFV-----TFHVSVEEAAKCRDLHGVR-WPQ--SNPKTLNIEFATKDELELDRHLN-  
 A0A087UBF0\_986\_1071 ---SKIIFVQNLVLRPFTLQQLKELLK-QSG-----N-L-I-EE-HFWIDKIKSHCFV-----MYETEQAQKTRNALHGVR-WPQ--SNPKILSVEFATEDDIEYHK-  
 UPI000B98F975\_607\_688 ---SDVLFITNLVLRPFTLQQLKELLA-RTG-----K-I-A-EN-GFWIDKIKSHCFV-----QYSDVEEAAIKTRNALHGVR-WPQ--SNPKTLVDFANHDDM-  
 A0A0A1WG15\_359\_443 -KTSNVLFIHNLVLRPFTLQQLKELLA-RTG-----K-L-V-ED-GFWIDRIKSHCFV-----TYETEQAQKTRQALHGVR-WPQ--SNPKCLIVDFAKRAMD-  
 A0A088A2F5\_203\_290 -KPTNILLIKNLVLRPFTLQQLKELLS-RTG-----T-I-V-EN-GFWIDRIKSHCFV-----EYANEDQAEETRALHGVR-WPQ--SNPKILRVEYATKDELELDR-  
 UPI0008116533\_356\_440 -KPSNVLFIHNLVLRPFTLQQLKELLA-RTG-----K-M-V-EE-GFWIDRIKSHCFV-----QYETEQAQKTRQALHGVR-WPQ--SNPKCLIVDFARKSDDL-  
 W4XHR7\_854\_941 ---TSNIVHVRNLVLRPFTLQQLKELLG-RYG-----T-L-S-AD-GFWIDRIKSHCFV-----TFESSDGAACRDLHGVR-WPQ--SNPKILRVEFADLNELELDRHMG-  
 UPI000A2A9C61\_664\_741 ---IHVNLVLRPFTLQQLKELLG-KHG-----T-L-V-DD-GFWIDKIKSHCFV-----VYSDIDGAKTRALHGVR-WPP--TSPKILSVEFATEDDIEYHK-  
 R7VLC9\_312\_398 ---VTKIVHVRNLVLRPFTLQQLKELLS-QHG-----T-L-A-EE-GFWIDRIKSHCFV-----SYETEQAQKTRALHGVR-WFS--SNPKILRVEYATKDELELDR-  
 UPI000B926133\_520\_603 ---SNIIYITNLVLRPFTLQQLKELNQ-RTG-----R-I-T-EN-GFWIDRIKSHCFV-----IYENEQAQKTRALHGVR-WPQ--SNPKSLVDFSTQEDDFDK-  
 UPI0005CEF3FA\_683\_766 ---ATNILLIKNLVLRPFTLQQLKELLS-RTG-----T-I-V-EN-GFWIDRIKSHCFV-----EYANEDQAEETRALHGVR-WPQ--SNPKLIVDFATKDELELDR-  
 E0VVJ6\_632\_711 -KPSNIIYITNLVLRPFTLQQLKELLA-RTG-----T-I-V-ED-GFWIDRIKSHCFV-----KYETEQAQKTRALHGVR-WPQ--SNPKQLVDFGTE-  
 A0A182H862\_457\_537 ---SNIIYITNLVLRPFTLQQLKELLA-RTG-----K-I-V-EN-GFWIDRIKSHCFV-----KYETEQAQKTRALHGVR-WFA--SNPKCLHVDGFTESA-  
 UPI0005ABD393\_649\_733 ---TSNILLIKNLVLRPFTLQQLKELLS-RTG-----T-I-V-EN-GFWIDRIKSHCFV-----EYANEDQAEETRALHGVR-WPQ--SNPKLQVEYSVKEEMDK-  
 K7IQ96\_683\_766 ---TNVLLIKNLVLRPFTLQQLKELLS-RTG-----T-I-V-EN-GFWIDRIKSHCFV-----EYTNEDQAEETRALHGVR-WPQ--SNPKLIVDFATKDELELDR-  
 U5EU16\_428\_510 ---CNIIYITNLVLRPFTLQQLKELLA-RTG-----K-I-V-EN-GFWIDRIKSHCFV-----KYETEQAQKTRALHGVR-WPQ--SNPKCLNVDGASDDME-  
 A0A0N8AW84\_345\_427 ---SSVLNVSNLVLRPFTLQQLKELLA-RTG-----H-L-V-EG-KFWIDRVKSSCLV-----QYATEQAQKTRALHGVR-WPQ--SNPKTLVDFSTVDELE-  
 UPI000811588E\_419\_501 ---STVLFITGLVLRPFTLQQLKELLC-LNG-----L-I-N-EE-KFWIDRIKSHCFV-----VYSTVEEAVKTRALHGVR-WPQ--SSPKLIVDFATKDELELDR-  
 UPI0006C99DD\_685\_768 ---ATNILLIKNLVLRPFTLQQLKELLS-RTG-----T-I-V-EN-GFWIDRIKSHCFV-----QYANEDQAEETRALHGVR-WPQ--SNPKLIVDFATKDELELDR-  
 A0A1S4H0J7\_601\_683 ---SNIIYITNLVLRPFTLQQLKELLA-RTG-----K-I-V-EN-GFWIDRIKSHCFV-----KYETEQAQKTRALHGVR-WPQ--SNPKCLVDFGSEEMD-  
 A0A1J1I2N1\_466\_549 ---SSNIIYITNLVLRPFTLQQLKELLL-RTG-----K-I-V-EN-GFWIDRIKSHCFV-----KYETEQAQKTRALHGVR-WFS--SNPKCLNVDGKDELELDR-  
 A0A194R348\_632\_718 -KQSNIIYITNLVLRPFTLQQLKELNQ-RTG-----R-I-T-EN-GFWIDRIKSHCFV-----IYENEDQAEETRALHGVR-WPQ--SNPKTLVDFSTQEDDFDK-  
 A0A158NJU1\_618\_703 -KPTNILLIKNLVLRPFTLQQLKELLS-RTG-----T-I-V-EN-GFWIDRIKSHCFV-----EYANEDQAEETRALHGVR-WPQ--SNPKLIVDFATKDELELDR-  
 A0A0B7AQS8\_916\_995 ---RVVRIITGLVLRPFTLQQLKELLK-RTG-----E-L-D-DE-YFWINAIKSHCLA-----AYKTQEEASATRALHGVR-WPQ--SNPKLIVDFATVDE-  
 E9HGW7\_916\_998 ---SSVLNVSNLVLRPFTLQQLKELLA-RTG-----H-L-I-DG-KFWIDRVKSSCLV-----QYETEQAQKTRALHGVR-WPQ--SNPKTLVDFSTVDELE-  
 UPI0006253782\_644\_731 -KPTNILLIKNLVLRPFTLQQLKELLS-RTG-----T-I-V-EN-GFWIDRIKSHCFV-----VYSDIDGAKTRALHGVR-WPQ--SNPKLIVDFATKDELELDR-  
 UPI0006C9B195\_635\_718 ---ATNILLIKNLVLRPFTLQQLKELLS-RTG-----T-I-V-EN-GFWIDRIKSHCFV-----EYKNEEDQAEETRALHGVR-WPQ--SNPKLIVDFATKDELELDR-  
 A0A1B6C4K4\_157\_239 ---SSVLYITNLVLRPFTLQQLKELLL-RTG-----T-I-A-EN-GFWIDRIKSHCFV-----EYTTEDAQAEETRALHGVR-WPQ--SNPKTLVDFSTHDDMA-  
 UPI0006CEBDF5\_581\_665 -KATNIIYITNLVLRPFTLQQLKELLA-RTG-----T-L-A-PN-GFWIDRIKSHCFV-----KYTTVEEAVKTRALHGVR-WPQ--SNPKLIVDFATKDELELDR-  
 UPI0004CDBC05\_721\_804 ---SLLIKNLVLRPFTLQQLKELLS-RTG-----S-I-V-EN-GFWIDRIKSHCFV-----EYSDNEEDQAEETRALHGVR-WPQ--SNPKLQVEYATKDELELDR-  
 UPI0007E8658D\_460\_544 ---ASHVLYITNLVLRPFTLQQLKELLA-RTG-----K-I-V-DED-GFWIDRIKSHCFV-----AYSTEQAQKTRALHGVR-WPQ--SNPKCLNVDGFSRTDMD-  
 A0A1B6MCH3\_322\_405 ---TSVLYITHLVLRPFTLQQLKELLL-RTG-----T-I-T-DN-GFWIDRIKSHCFV-----EYTTEDAQAEETRALHGVR-WPQ--SNPKTLVDFSTHDDMA-  
 UPI000771E011\_602\_684 ---SLLIKNLVLRPFTLQQLKELLS-RTG-----T-I-T-EN-GFWIDRIKSHCFV-----EYANEDQAEETRALHGVR-WPQ--SNPKLIVDFATKDELELDR-  
 A0A1E1WU44\_526\_610 -KQSNIIYITNLVLRPFTLQQLKELNQ-RTG-----K-I-V-EN-GFWIDRIKSHCFV-----QYDNEDQAEETRALHGVR-WPQ--SNPKTLVDFSTHDDMA-  
 A0A1Q3F462\_462\_540 ---SSVLYITNLVLRPFTLQQLKELLA-RTG-----K-I-V-EN-GFWIDRIKSHCFV-----KYDNEDQAEETRALHGVR-WPQ--SNPKCLHVDGFTESA-



1008            1020            1030                            1040            1050                            1060            1070            : \*            1080            1090            1098  
 A0A218XBD4\_529\_608    ---TNSLRIDRFLRPFTIKAVQELLG-KTG-----T-V---K-SFWMQIKTHCYV-----TYSSVEEAVETRNNAVYNLQ-WPP--NGGRLLVAEFVPEEV-----  
 A0A1X7V4K9\_702\_782    ---SRLLHVENLKRPFITLQKDFLQ-EDG-----P-M-I-EG-GFWTNKIKSHCIA-----IFTSTETAVAAARMHGLIK-WPS--INPQHKKVDFLSNQE-----  
 UP100090CEDDE\_538\_616 ---NSLRIDRFLRPFTIKAVQELLG-KTG-----N-V---S-SFWMQIKTHCYV-----TYSSTEEAETRNNAVYNLQ-WPP--NGGRLLVAEFVPEEV-----  
 D5ACP8\_24\_99            ---KERFLRPFTIKALKKELLS-ETG-----T-I---R-YFWIDQIKTHCYV-----TYSSVEEATATRNALYNLQ-WPI--IGGRLLIAEFVDPPEEV-----  
 UP100057AAF58\_462\_541 ---LRIDRFLRPFTIKAVQELLA-KTG-----T-V---C-SFWMQIKTHCYV-----TYSSVEEAVATRNNAVYNLQ-WPT--NGGKLLAEFVDPQEVKHH-----  
 UP10004E5A783\_456\_535 ---LRIDHFLRPFTIKAVQELLA-KTG-----T-V---C-SFWMQIKTHCYV-----TYSSVEEAVATRNNAVYNLQ-WPP--NGGKLLAEFVDPQEVKQH-----  
 D8RWQ6\_432\_508        ---LRIDRFVVRPFTIKALKDILLA-DTG-----N-F---T-DFWMQIKTHCYV-----TYSSVDEAVATRNALHNLK-WPV--IGGKQLVAEFVPEEV-----  
 A0A0K9PH74\_440\_521    ---NSLRIDNFRPFTIKAVQELLG-KTG-----T-V---C-SFWMQIKTHCYV-----TYSSEEEAVKTRDAVYNLQ-WPA--NGRLLMADFDPQEVKHH-----  
 A0A0M3JWR1\_592\_676    ---NQVLMIRQLTRPFTSKQLQQLA-TYG-----T-I-V-EN-GFWIDNIKSTCIV-----KYSTIEEAIVARGRLHNVV-WPI--HSPKALKVDYSDDPGLAKH-----  
 A0A0C2MY96\_112\_190    ---YVHVSNLVRPFTIGDLOEFLS-EGE-----G-L-D-TD-HFWIDSIKSHCYV-----KYKSIESAAKVVERCNGVQ-WPD--HNPKRLLVDFADIER-----  
 J9B3J9\_106\_191        ---VNQVIMIRQLTRPFTVKQLQQLS-TFG-----T-V-V-EG-GFWIDNIKSTCIA-----KYSTVEEAVVARGRLHNVV-WPP--CSPRTLKIDYSDDANLTKH-----  
 A0A1D1XQ91\_216\_295    ---LRIDRFLRPFTIKAVQELLA-KTG-----T-V---C-SFWMQIKTHCYV-----TYSSVEEATATRNNAVYNLQ-WPP--NGGRLLTADFVDPQEVKMH-----  
 A0A176W2N2\_556\_631    ---KIDRFVVRPFTIKAVKELLE-QTG-----T-V---K-DMWMQIKTHCFV-----TYSAVVEEAVATRNALYHLQ-WPV--AGGKLLVAEFVPEEV-----  
 A0A1E5WC87\_606\_682    ---LRIDRFVVRPFTIKAVQELLG-KTG-----S-I---C-SFWMQIKTHCYV-----TYSSVEEAVTTRDAVYNLQ-WPP--NNHNLVAEFVDPQEV-----  
 UP100098DBDAD\_514\_593 ---TNSLRIDRFLRPFTIKAVQELLG-KTG-----N-V---S-SFWMQIKTHCYV-----TYSSVEEAEIETRNNAVYNLQ-WPP--NGGRLLVAEFVDPPEEV-----  
 A0A251S9X5\_413\_489    ---LRIDRFLRPFTIKAVQELLG-KTG-----T-V---V-SFWMQIKTHCYV-----TYSSVEEAEIETRNNAVYNLQ-WPT--NGGRLLIAEFVDPSEV-----  
 A0A022Q8V8\_68\_147    ---SNSLRIDRFLRPFTIKAVQELLG-KTG-----T-V---T-SFWMQIKTHCYV-----SYSSVEEAEIETRNNAVYNLQ-WPP--NGRLLAEFVDPQEV-----  
 A0A1U8NTI2\_513\_589    ---LRIDHFLRPFTIKAVQELLG-KTG-----T-V---T-SFWMQIKTHCYV-----TYSSVEEAEIETRNNAVYNLQ-WPP--NGGRLLVADFVDPQEV-----  
 A0A0N4UCY2\_5\_81        ---VIIRQLTRPFTVKQLQQLS-KFG-----Q-I-A-EN-GFWIDNIKSTCIV-----KYSTVEEAVIARGRLHNVV-WPS--CSPRMLKVDYTDTE-----  
 A0A0N5D521\_435\_520    ---VNQVIMIRQLTRPFTVKQLQQLS-IFG-----T-I-V-EG-GFWIDNIKSTCIA-----KYSTVEEAIVARGRLHNVV-WPP--CSPRTLKIDYSDDANLAKH-----  
 UP10004E54C21\_446\_525 ---LRIDRFLRPFTIKAVQELLA-KTG-----T-V---C-SFWMQIKTHCYV-----TYSSVEEAMATRNNAVYNLQ-WPP--NGGKLLVAEFVDPQEVKMH-----  
 UP100098E3031\_571\_647 ---LRIDHFLRPFTIKAVQELLA-KTG-----T-V---V-DFWMQIKTHCYV-----TYSSVDEEATATRNALYNLQ-WPT--NGRLLVAEFVDPQEV-----  
 A0A0E0LNK8\_711\_787    ---LRIDRFVVRPFTIKAVQELLG-KTG-----S-V---C-SFWMQIKTHCYV-----TYSSVEEALATRNNAVYNLQ-WPP--NGSYLVAEFVDPHEV-----  
 V4A0P6IPW8\_48\_129    ---TSKVLFTNLVVRPFTI VALRELLS-RTG-----T-V---E-DLWIDSIKSKCFV-----IFSTEDQAYETRQALHGK-VPE--HSLKTLNVFSTEEEMN-----  
 A0A0PD6\_523\_602        ---NSLRIDHFLRPFTIKAVQELLG-KTG-----T-F---T-SFWMQIKTHCYV-----TYSSVEEAEIETRNALYNLQ-WPP--NGGRLLVAEFVDPQEV-----  
 A0A0D2WU61\_161\_233    ---TLHIANFSRPLTIQVNEELLA-RTG-----K-V-V-PD-TFWMDSIKSQCYA-----TFETVEEANATFEALNGIN-WPA--HNMKKLVVQ-----  
 UP100078901DB\_534\_612 ---NSLRIDRFLRPFTIKAVQELLG-KSG-----S-I---T-SFWMQIKTHCYV-----TYSSVEEAEIETRNNAVYNLQ-WPP--NGGRLLVAEFVDPQEV-----  
 UP100074FOCE6\_524\_602 ---NSLRIDQFLRPFTIKAVQELLG-KTG-----N-V---V-SFWMQIKTHCYV-----TYSSVEEAEIETRNNAVYNLQ-WPP--NGRLLVAEFVDPQEV-----  
 A0A103XK13\_529\_605    ---LRIDRFLRPFTIKAVQELLG-KTG-----T-V---V-SFWMQIKTHCYV-----TYSSVEEAVETRNNAVYNLQ-WPV--NGGRLLAEFVDPSEV-----  
 A0A0E0D1G3\_327\_403    ---LRIDRFVVRPFTIKAVQELLG-KTG-----S-L---C-SFWMQIKTHCYV-----TFSSVEEAVATRDVAVDQ-WPP--NGNRLVAEFVDPQEV-----  
 A0A251S6M2\_394\_470    ---LRIDNFRPFTIKAVQELFLG-KTG-----T-V---V-SFWMQIKTHCYV-----TYASVEEAEIETRNNAVYNLQ-WPV--NGRLLMADFVDPQEV-----  
 UP1000901EF53\_679\_757 ---NSLRIDNFRPFTIKAVQELLG-RTG-----K-I---C-NFWMQIKTHCFV-----KFSVEEAEIETRNNAVYNLQ-WPT--NGRLLMADFVDPQEV-----  
 A0A1D5Y2H8\_499\_575    ---LRIDRFVVRPFTIKAVQELLG-KTG-----S-V---C-SFWMQIKTHCYV-----TFSSVEEATATRDVAVYNLQ-WPP--NNGNYLVAEFVDPQEV-----  
 A0A1J7H743\_502\_578    ---LRIDRFLRPFTIKAVQELLG-KTG-----K-V---N-SFWMQIKTHCYV-----TYSSIEEAEIETRNNAVYNLQ-WPP--NGRLLVAEYVPEEV-----  
 G7LAF9\_517\_595        ---NSLRIDRFIRPFTIKAVQELLG-KSG-----N-I---I-SFWMQIKTHCYV-----SYSTVEEATETRDVAVYNLQ-WPP--KGGKLLVAEYVPEEV-----  
 UP100077659FE\_466\_542 ---LRIDRFVVRPFTIKAVQELLG-KTG-----S-V---C-SFWMQIKTHCYV-----TYSSLEEAVATRDVAVYNLQ-WPP--NNGNRLVAEFVDPQEV-----  
 UP1000B8C7FA6\_550\_627 ---NSLRIDRFLRPFTIKAVQELLG-KTG-----T-A---T-SFWMQIKTHCYV-----TYSSVEEAVETRNNAVYNLQ-WPP--NGGRLLVAEFVDPQD-----  
 A0A1S2YBQ1\_540\_618    ---NSLRIDQFLRPFTIKAVQELLG-KTG-----C-V---S-SFWMQIKTHCYV-----TYSSIEEATETRNNAVYNLQ-WPP--NGRLLVAEYVDPPEEV-----  
 UP10002C31E11\_542\_620 ---NSLKDHFVVRPFTIKAVHELLG-KTG-----K-V---T-DFWMQIKTHCFV-----TYSSVEEAVETRNNAVYNLQ-WPT--NGRLLVADFVDPQEV-----  
 A0A0N4VIW8\_206\_284    ---SEYLLIRQLTRPFTVKQLKAMLG-NYG-----A-L-D-EQ-GFWIDNIKSKCIV-----KYSSKEEAVVARGRLHNLV-WPV--GNPKELKVDIFIDE-----  
 UP100053B04C9\_466\_544 ---NSLRIDRFLRPFTIKAVQELLG-KTG-----N-V---T-SFWMQIKTHCYV-----SYSSVEEAAATRQAVYNLQ-WPP--NGGRFLTAEFVGPPEEV-----  
 A0A1U8GE11\_598\_676    ---TNSLKIENFVRPFTIKAVQELLA-RTG-----E-V---C-SFWMQIKTHCYV-----TYSSVEEAEIETRNNAVYNLQ-WPP--KGGRLVTFVDPQO-----  
 B8LLW2\_463\_541        ---LRIDRFLRPFTIKAVQELLA-KTG-----V-V---T-SFWMQIKTHCYV-----TYSSIEEAVATRNALYNLQ-WPS--NGGRQLIAEYVDPPEEVKHH-----  
 A0A0F5CSK2\_50\_131    ---TVVHMRCLVRPFTILPQLRAEIG-KHG-----S-I---KDGRFWDPLKSHCIF-----EMETVDQATSVCSALHGQH-WPP--ANPKTLVSNYSTEDLD-----  
 A0A0K9PIS0\_452\_533    ---NSLRIDRFLRPFTIKAAQELLG-KTG-----T-V---C-SFWMQIKTHCYV-----TYSSEEEAVETRNNAVYNLQ-WPP--NGRLLVAEFVDPQEVKHH-----  
 W9RB93\_521\_599        ---NSLRIDRFLRPFTIKAVQELLG-KTG-----N-I---T-SFWMQIKTHCYV-----TYSSVEEAEIETRNNAVYNLQ-WPP--NGRLLAEFVDPQEV-----  
 M8BM86\_648\_722        ---LRIDRFVVRPFTIKAVQALLG-RTG-----S-V---C-SFWMQIKTHCYV-----TYSSVDEAVATRNNAVYNLQ-WPL--NNGSYLAEFVDPDL-----  
 G7J4D9\_527\_605        ---NSLRIDQFLRPFTIKAVQELLG-KTG-----S-V---S-SFWMQIKTHCYV-----TYSSTEEAEIETRNNAVYNLQ-WPT--NGRLLIAEFVDPPEEV-----  
 UP100057B5482\_500\_580 ---LTNSLRIDRFLRPFTIKAVQELLG-KTG-----S-V---T-SFWMQIKTHCYV-----TYSSVEEATETRNNAVYNLQ-WPP--NGRLLVAEFVDPQEV-----  
 WLNWH5\_494\_570        ---LRIDRFLRPFTIKAVQELLA-KTG-----T-F---C-SFWMQIKTHCYV-----TYSSVEEAVETRNALYNLQ-WPP--NGRLLAEFVDPEDV-----  
 UP1000901E0A4\_438\_520 ---TNSLRIDRFLRPFTIKAVQELLG-KTG-----T-V---T-SFWMQIKTHCYV-----SYSSVEEANETRNALYNLQ-WPS--NGRLLVAEFVDPLEVKMH-----  
 A0A067LQNS\_510\_588    ---NSLRIDRFVVRPFTIKAVQEFLG-KTG-----T-I---T-SFWMQIKTHCYV-----SYSSVEEAVETRNNAVYNLQ-WPP--NGRLLVAEFVDPHEV-----  
 V4LRJ7\_462\_541        ---TNSLRIDHFLRPFTIKAVQELLG-KTG-----N-V---V-SFWMQIKTHCYV-----SYSSVEEAAATREAVYNLQ-WPP--NGRLLAEFVGPPEEV-----  
 K4A6D5\_530\_606        ---LRIDRFVVRPFTIKAVQELLG-KTG-----S-V---Q-NFWMQIKTHCFV-----TFSSVDEAVATRDVAVYNLQ-WPP--NNGNKLIAEFVDPQEV-----  
 A0A0K9QK57\_566\_646    ---TNSLRIDRFLRPFTIKAVQELLA-KTG-----T-V---T-SFWMQIKTHCYV-----TYSAVEEAEIETRNNAVYNLQ-WPP--NGRQLTAEYVDPPEVQ-----  
 UP100053C910B\_462\_540 ---NSLRIDRFLRPFTIKAVQELLG-KTG-----N-V---A-SFWMQIKTHCYV-----SYSSIEEATATRNNAVYNLQ-WPP--NGRLLVAEFVDPPEEV-----  
 A0A199VMY1\_473\_549    ---LRIDRFVVRPFTIKAVQELLA-KTG-----S-V---C-SFWMQIKTHCYV-----TYSSVEEAAATRDVAVYNLQ-WPP--NNGNHLIAEFVDPNEV-----  
 A0A0U9HKG1\_390\_470    ---SVRVNVLVRPFTERALRALLS-ETG-----T-I-E-EN-GFWMDSIKTHCFV-----MFKSVEDAVTRREALFNLQ-WPP--LGGKHLVSVVAESEVE-----

1008 1020 1030 1040 1050 1060 1070 :\* 1080 1090 1098

UPI00053C4F72\_480\_558 ---NSLRIDRFLRPFTIKAVQELLG-ETG---N-V-T-SFWMDOIKTTCYV---SYSSVEEAMATRNATYSLQ-WPP---NGGRLLVAEFVGPPEV---

AOA0A8Z6E8\_731\_805 ---LRIDRFVLRPFTIKAVQELLG-KTG---S-V-C-SFWMDHIKTTCYV---TYSSVEEAVDTRNAVYNLQ-WPP---NNHSCLVAEFVDPDL---

UPI0004989003\_547\_625 ---NSLRIDRFLRPFTIKAVQELLG-KTG---S-V-N-DFWMDHIKTTCYV---TYSSVEEALETNRNAVYNLQ-WPP---NGGRLLVAEFVDPQEV---

AOA0N5A175\_685\_760 ---LLIROLTRPFTIKQLKGMIS-NYG---T-L-V-ED-GFWIDNIKSKCIV---KYSKKEEATVARGSLHNLV-WFF---GNPKELKVDIFIDE---

AOA1U8JGY7\_357\_435 ---SLRVDNFLRPFTIKAVQELLG-KTG---I-I-T-SFWMDHIKTTCYV---TYLSEEALETNRNAVYNLQ-WPP---NGGRLLVAEFVDPHEVE---

UPI00077EBE04\_536\_614 ---NSLRIDRFLRPFTIKAVQELLG-KTG---K-V-T-NFWMDHIKTTCYV---TYSSVEEAIKTRNAVYNLQ-WPP---NGGRLLVAEFVDAQEV---

UPI000B9384ED\_577\_655 ---NSLRIDRFLRPFTIKAVQELLG-KTG---N-V-T-SFWMDHIKTTCYV---TYSSVEEAMKTRDAVYNLQ-WPP---NGGRLLMAEFVDPQEV---

AOA200QW37\_535\_613 ---NSLRIDRFLRPFTIKAVQELLA-KTG---T-V-S-SFWMDHIKTTCYV---TYSSVEEAKETRNALYNLQ-WPA---NGGRLLVAEFVDPQEV---

AOA1I8BWY4\_454\_534 ---RWVHIRGLKRPYTORALLELLG-KFG---T-V-D-EG-AFWIDSIKSNICIV---TFDTVEQAEELARERLHNV-I-WPT---ASTDALCEVFSTDEKKL---

A9TNC4\_510\_585 ---KIDKFLRPFTIKAVKELLA-QTG---T-V-E-DVWMDQIKTTCYV---TYSSVEEATATRNALYNLQ-WPP---QGGRLLTAEFVDPSEV---

UPI00084AE5FC\_3008\_30 ---SCVVIKNLTRPFTIKRLQTLQ-RTG---R-I-VQPD-GFVNVNVKSVCI A---RFENEDQAEETRAHLHGILQ-WFS---SNPKTLFVDFTTQEELELRH---

MICMR4\_684\_759 ---LKIENFLRPFTIKAVQELLA-RTG---E-V-C-CFWMDOIKTTCYV---TYSSVEEATETRNNAVYNLQ-WPP---NGGRLLVADFVDPQQ---

UPI000B78E54B\_493\_572 ---TNSLRIDRFLRPFTIKAVQELLS-KTG---T-V-T-SFWMDHIKTTCYV---TYSSVEEAMETRNNAVYNLQ-WPP---NGGRQLLAEFVDPPEV---

AOA166G2E4\_508\_585 ---LRIDRFLRPFTIKAVQELLG-KTG---T-V-T-KFWMDHIKTTCYV---NFSSIEEALETNRNAVYNLQ-WPA---NGGRLLVAEFVDPQEVQ---

AOA0D3BJI6\_442\_518 ---LRIDRFLRPFTIKAVQELLG-KTG---N-V-T-SFWMDSIKTTCYV---SYSSVEEAAATREAVYNLQ-WPT---NGGRLLTAEFVGSSEV---

MOSA51\_147\_223 ---LRIDKFLRPFTIKAVQELLA-KTG---T-V-C-SFWMDHIKTTCYV---TYSSVEEANATRNNAVYNLQ-WPP---NGGNLLIAEFVDPQEV---

AOA0Q3NDB0\_758\_822 ---LRIDRFVLRPFTIKAVQELLG-RTG---S-V-C-GFWMDOIKTTCYV---TYSSVEEAVATRNNAVYNLQ-WPP---NNVQ---

UPI0005817327\_575\_653 ---NSLRIDRFLRPFTIKAVQELLG-KTG---N-V-T-SFWMDHIKTTCYV---SYSSVEEAVETRNNAVYNLQ-WPL---NGGRLLVAEFVDPQEV---

E0CRG0\_476\_654 ---NSLRIDRFLRPFTIKAVQELLA-KTG---N-V-C-SFWMDHIKTTCYV---TYSSVEEAKETRNALYNLQ-WPP---NGGRLLVAEYVDPQEV---

MOSGK0\_533\_508 ---LRIDRFLRPFTIKAVQELLA-KTG---T-V-C-SFWMDHIKTTCYV---TYSSVEEATATRNNAVYNLQ-WPP---NGGNLLVAEFVDPQD---

F6H4N5\_465\_543 ---NSLRIDRFLRPFTIKAVQELLG-KTG---S-V-T-SFWMDHIKTTCYV---SYASVEEAMETRNNAVYNLQ-WFS---NGGRLLVAEFVDPQEV---

AOA166BQ88\_546\_623 ---LRIDRFLRPFTIKAVQELLG-KTG---K-V-T-NFWMDHIKTTCYV---SYSATVEEAVETRNNAVYNLQ-WPA---NGGRLLVAEFVDPQEVQ---

AOA200PYK4\_615\_691 ---LRIDHFLRPFTIKAVQELLA-KTG---A-V-C-SFWMDHIKTTCYV---MYSVEEAELETNRALYNLQ-WPP---NGGKLLVAEFVDPQEV---

M5W712\_461\_539 ---NSLRIDRFLRPFTIKAVQELLG-KTG---K-V-T-DFWMDHIKTTCYV---TYSSAEAELETNRNAVYNLQ-WPP---NGGRLLVAEFVDPQEV---

AOA0M3HTV5\_169\_257 ---LVVMIRQLTRPFTISERLKRMLLS-TFG---T-I-V-EG-GFWIDTIKSTCIKVIETVYLSSYSIEEAAVARDALHNTF-WFH---GNPKLKVVDYSNESEL---

AOA0D3A0Z8\_365\_443 ---NSLRIDRFLRPFTIKAVQELLG-KTG---N-V-T-SFWMDTIKTTCYV---SYGSVEEAAATREAVYNLQ-WPP---NGGRLLTAEFVGPPEV---

UPI0009F1D314\_650\_726 ---LRIDNFLRPFTIKAVQELLA-QTG---N-V-C-DFWMDHIKTTCYV---TYSSVEEAAETRKAVYNLQ-WPP---NGGRLLLAAEFVDPQEV---

W1NFM1\_563\_639 ---LRIDQFLRPFTIKAVQELLA-KTG---T-V-S-KFWMDOIKTTCYV---TYSSDEEAMATRNALYNLQ-WFS---NGGRCLTAEFVDPPEV---

AOA1U8AMV4\_457\_533 ---LRIDRFLRPFTIKAAQELLA-KTG---N-V-C-SFWMDHIKTTCYV---TYSSVEEALETNRALYNLQ-WFS---NGGRLLVAEFVDPQEV---

O65655\_457\_535 ---NSLRIDRFLRPFTIKAVQELLG-KTG---N-V-T-SFWMDHIKTTCYV---SYPVEEAAATREAVYNLQ-WPP---NGGRHLIAEFVRAPEV---

AOA1S4BES0\_477\_551 ---NSLLIGNFLRPFTIKAVQELLS-KTG---T-V-T-NFWMDHIKTTCYV---SFSSVEEALETNRNAVYNLQ-WPP---HVGLLVAEFVDPQEV---

AOA10924U1\_138\_214 ---LRIDNFVRPFTILPAVKEWVQ-QVQ---N-F-VDDT-GFWIDSIKTTCYV---TFPTLELATATRELRHQV-WPT---PHGKVISCDYSAE---

UPI000644D74D\_221\_302 ---VSRTELLVNFIRPFRV-EHAKQLMS-ETG---T-V-E-QFWMNDIHSYCFV---TFATEEAEATRNRLHGLV-WPE---LNRKTLSEVYSSEKFEF---

AOA1U8A2D2\_462\_538 ---LRIDRFLRPFTIKAVQELLA-KTG---K-V-C-SFWMDHIKTTCYV---TYSSVEEATETRNALYNLQ-WPP---NGGRLLVAEFVDPQEV---

A9SKT2\_533\_607 ---KIDRFLRPFTIKAVKELLA-LTG---T-V-Q-DIWMDOIKTTCYV---TYSSVEEATATRNALYNLQ-WPP---QGGRLLTAEFVDPQSD---

AOA199V3C3\_568\_643 ---LRIDRFVLRPFTIKAVQELLA-KTG---S-V-C-SFWMDHIKTTCYV---TYSSAEAEATRNNAVYNLQ-WPP---NGGNLLIAEFVDPQD---

UPI0009051E64\_682\_756 ---NSLLIENFLRPFTIKAVQELLS-KTG---T-V-T-NFWMDAIKTTCYV---SFASVEEAELETNRNAVYNLQ-WPP---HGGKLLVAEFVDPQEV---

T0QL75\_175\_253 ---SCTLRIDNFVRPFTILPAVHALVQ-ADG---S-F-V-EDH-GFWIDGIKTTCYV---TFATPEIATATRQLRHGVV-WPA---HHGKTLSDVYSA---

UPI00053F6312\_522\_598 ---LRIDRFLRPFTIKAVQELLA-KTG---T-V-T-SFWMDHIKTTCYV---SYSSVEEATETRNNAVYNLQ-WPP---NGGRQLVAEFVDPPEV---

UPI0008DCB91A\_507\_585 ---NSLRIDRFLRPFTIKAVQELLQ-KTG---S-V-A-SFWMDHIKTTCYV---TYSSVEEALETNRNAVYNLQ-WPP---KGGRLLLAEFVDPQEV---

V9FJ94\_173\_250 ---TLRIDNFVRPFTILNAVKTIVQ-ELG---N-F-V-ED-GFWMDAIKTTCYV---TYPSTSEIAEKTSALNCKV-WPP---ENGRSLSVKLDADHT---

H3GQ66\_190\_266 ---NTRIDNFIRPFTILNAVKALVQ-ECG---D-F-V-ED-GFWMDAIKTTCYV---TYSTPEIAEKTTAALNCKV-WPP---ENGRSLKTIPTTE---

DONGE4\_164\_243 ---LRIDNFIRPFTILNAVKALVQ-ELG---N-Y-V-ED-GFWMDAIKTTCYV---TYPSTSEIAKKTSAALNCKV-WPP---ENGRSLRVKPADHSAME---

AOA225WZM4\_143\_221 ---LRIDNFVRPFTILNAVKALVQ-ELG---N-F-V-ED-GFWMDOIKTTCYV---TYSSPEVAKKTSSALDCKV-WPP---ENGRALSVKPADHTAM---

UPI0009E2B69C\_628\_704 ---LRIDNFLRPFTIKAVQELLA-QTG---K-V-C-DFWMDHIKTTCYV---TYSSAEAELETNRNAVYNLQ-WPP---NGGRLLVAEFVDPQEV---

AOA0V1MCH8\_593\_675 ---SPVIYVRLTRPFTIALHNLG-SFG---S-Y-S-KK-NFWINNIKSSCLV---KYDDIESAVKARDALHNV-R-WPA---SNPKTLHVDFTTQEELE---

AOA0P1A467\_167\_242 ---LRIDNFIRPFTILNAVKTIVQ-ELG---N-F-V-EN-GFWMDAIKTTCYV---TYPSTSEIAVKTSKSLNCKV-WPP---ENGRSLQVKFVDH---

A8XEJ9\_279\_360 ---VSNVHIRGLTRPFTERQLRNEIE-KHG---CEI-T-DFWIDKVKSHCFA---KLTNEDAGNVRNAMHDIV-WPD---GNPKLVAIVFESSENM---

G4YV57\_217\_294 ---LRIDNFVRPFTILNAVKALVQ-ELG---S-F-V-ED-GFWMDAIKTTCYV---TYPSSDIAEKTKAALNCKV-WPP---ENGRSLKVEFVDHTA---

AOA0B1SY92\_223\_307 ---SDLVHIRGLTRPFTDRALKAEIIL-KSG---QI-V-GFWIDSVKSHCIV---QMGSIEEAREVRLAMHNTQ-WPA---ANPKTLVQDFTKENMERHR---

AOA024TNU6\_162\_241 ---LRIDNFIRPFTILNAVKAIVQ-EEA---A-F-V-EN-GFWMDAIKTTCYV---TYATDDAAIARCRITYCTT-WPE---LSGRRLTVEFSAETAMD---

AOA1I7TJZ6\_288\_368 ---VSNVHIRGLTRPFTERQLRNEIE-KHG---CEI-V-DFWIDKVKSHCFA---KFNSSENAKSVLEAMHNTV-WPD---GNPKLVAIVFETEEN---

U5D2R9\_350\_411 ---RIDQFLCPFTIKAVQELLA-KTG---T-V-S-KFWMDHIKTTCYV---TYSSVEEAMATRNALYNLQ-WFS---NG---

AOA0D8XTR4\_334\_418 ---SEIHIRGLTRPFTDRALKGEIV-KCG---QI-V-DFWIDSVKSHCIV---QMGSIEEAREVRLAMHNTQ-WPA---ANPKTLVQDFTKENMERHR---

E3MG12\_299\_380 ---VSNVHIRGLTRPFTERQLRNEIE-RHG---CEI-T-DFWIDKVKSHCFA---QLNTDADAGKVLDAHMDIV-WPD---GNPKLVAIVFDTEDNM---

W2TVR7\_343\_427 ---SDIHIRGLTRPFTDRALKAEIIL-KCG---QI-T-DFWIDSVKSHCIV---QMRSVDEAREVRLAMHNTQ-WPT---ANPKTLVQDFTKENMERHR---

P91156\_292\_377 ---VSNVHIRGLTRPFTERQLRAEIQ-KNC---CEI-V-DLWMDKVKSHCIV---KLNSDADAGNVISAMNVV-WPD---GNPKRLSIVYDTEENLIKHR---

W4GA29\_179\_255 ---TIRIDNFIRPFTILNAVKAIVQ-VDA---S-F-V-DD-GFWMDAIKTTCYV---TYATDDAAIDARSRIYCTT-WPE---LSGRQLTVDFSTD---



```

1008      1020      1030      1040      1050      1060      1070      :*      1080      1090      1098
AOA158R9A6_1371_1448  ---SSLVYIRCLVRFPTAAQLATMLETHFG-----R-A--S--ELWLDRIKSTAVA-----RFSNEVAAKCREGLDGR-WPS--INPRILQCEFASE-----
AOA0B7MPJ3_107_177    ---AIYVKGFIRPLIKHVQELFG-KYG-----T-V--K--RFWMDSIKTHCYV-----TYE'RLQKAEAFANVDIK-FPA--DTGRILITVG-----
AOA1C7NMC0_299_376    ---LYVKGFIIRPLIRHVQELFS-KHG-----T-V--K--RFWMDMIKTHCYV-----IYENESEAKEAFNHINGIV-FPP--ETGRLELTAGYLTQDAE-----
AOA0F7TQ9_354_408     ---KVV--K--EFWLDPIKTHCFV-----QFDDIASASRVSRAIHGTV-WPN-ERNRKSILWADFIPDDR-----
AOA1I8IAH0_392_447     ---S-AIIVKGFVRPLIRQAQDLFA-KYG-----N-V--K--RFWMDSIKTHCYV-----IYETIEEAKKAYNQVNGII-FPS--DTGRKL-----
AOA0A1N6S4_230_298    ---LYIRELLRPLQPNALREHLE-TIS-----QSAI--E--DFHLDKIRTHAFV-----LFESVDAATRVAALHDNK-WPD-EAMRKLWIDYIPEDKV-----
N1PPY4_230_309        ---TTSVYICNLHRPIATAVFRARLE-KIA-----QEEV--T--LFWISKLRTHCFV-----TLPSTEAARVRDTFHNHG-YPD-RDSPTKLFADYIPPEK-----
AOA1F5LU82_347_410    ---SAPGT-ADSDTI-----I--DFYLDISKTHCFV-----SFTSVAAASRVSRAVHGTW-WPN-ERNRKSILWADFIPDDQI-----
AOA1V6QH08_357_417    ---GL-PGSDTI-----I--DFYLDISKTHCFV-----SFTSVAAASRVSRAVHGTW-WPN-ERNRKSILWADFIPHDKI-----
AOA1X2HHM6_40_108     ---SNAIITNLVRLPIITRRVQEVYS-QHG-----T-V--K--RFFLDAIKTHAFV-----IYENNEQAVAAAYRGMDGIQ-FPK--DTGRN-----
AOA1V6SEU1_332_416    ---YIDGLMRPLQPTALRKHLA-SLASAPGT-TSDAI-----I--DFYLDIAIKTHCFV-----SFTSVAAASRVSRAVHGAV-WPN-ERNRKSILWADFIPDEK-----
X6LLK7_289_354        ---VEGFKRPLNPTKLLHRFG-EFG-----P-V--K--RFWINNVKTHCYV-----VFSVDDAVKCRAMDTY-YPT-DQPKIHA-----
G0S6C9_235_323        ---LYIKNFMRLREPVLDYLV-ELALPGTSPDSCI-----V-SFYLDPIRTHSFV-----QFSTVAAASRVSRAIHGTV-WPN-ERNRKLWVDFIPEGKVD-----
AOA0M8P832_330_415    ---LYIDGLMRPLQPAALRKHLA-SLASTLET-TSDAI-----V--DFYLDISKTHCFV-----SFTSLAAASRVSRAVHGTW-WPN-ERNRKNLRADFIPDEK-----
AOA139HG41_197_281    ---TRALYINNLIRPLKPEHLREHLL-AAS-----SSDDSVI--E--IFHLDKIRTHAFV-----LFSSNLVAVQVRAALHDKV-WPD-EPQRKALWVDYIPNEK-----
FOZUS1_240_321        ---LLITKLVRFPRDAFEKLLIN-QYG-----QGT--E--HYWLNNIKSKAYV-----TFNSNDAAIAMKSLDGLT-WPE--LNRKTLVVSSTLESESEYQK-----
AOA1V6UN99_331_415    ---YIDGLMRPLQPSALRKHLA-SLASAPGT-TSDDI-----I--DFYLDIAIKTHCFV-----SFTSLAAASRVSRAVHGTW-WPN-ERNRKNLRADFIPPEK-----
B6HNU5_351_415        ---LACAPGT-TSDAI-----V--DFHLDISKTHCFV-----SFNSITAAASRVSRAVHGTW-WPN-ERNRKNLRADFIPPEK-----
R7Z368_456_511        ---E-SFFLDSIKTHCFV-----RFSSITAAARVRAALHGAV-WPP-ERTRKPLFVDFIPEEKLE-----
UPI000711CA4E_33_99  ---LYIDGFIIRPFTMEVVKQLVS-RTV-----SPI-NLDE-HFFMNVAKTFCYV-----TYPSEAAARKAKEVIEETK-FPE-SF-----
AOA061RBR7_362_436    ---LRIDNFVRPFTKQLLEQMLS-AFG-----E-L--K--GIWLAPIKTHCYA-----IFESEVAEKCRQGTVDLE-WPE--GHGKRLVPRFVALB-----
AOA197JFR3_359_426    ---ALTIITNFVRPLVISOVKRMLS-EYG-----E-I--E--TLWLDISKTHCYV-----VFKETAEAEKAYNHTNMMV-FPQ--ETGKAL-----
AOA0W4ZM81_132_219    ---IYVGNFTRPLQIPQLKSYLL-DVIKIDD-SNDDIL-----K--KIWMDFRTHAFV-----VFS'TIKQKRVREVLHNSI-WPC-EKGRKPLWVDYIPENKVD-----
AOA0G4PGV7_330_414    ---LYIDGLMRPLQPAALRKHLA-SLASTPET-TSDAI-----I--DFYLDISKTHCFV-----SFTSLAAASRVSRAIHGTV-WPN-ERNRKNLRADFIPDE-----
AOA168D288_352_408    ---STDII--Q--NFFLDQIRSHCFV-----TFDVASAVRARSLLHDEV-WPN-ESMRKPLWIDFIPDDR-----
AOA135LLG5_330_415    ---LYIDGLMRPLQPAALRKHLA-SLASASGT-TSDPI-----I--DFHLDIAIKTHCFV-----SFTSLAAASRVSRAVHGTW-WPN-ERNRKNLRADFIPDEK-----
S8BXU4_360_446        ---LYIRDVLRPLQESQLRTHLV-QLASKSA-DDDSVL-----E--MIYLDGIKTHCFA-----IFSSVQACSRARNGVHGKL-FPN-EKNRKLVLADYVPEEKID-----
F9X577_224_309        ---ALYICNLVRLPLQPSALREHLL-SIATPQS-NDAPFI-----E--TFFLDRIKTHAFV-----LFTLPAAIRARSSIHQV-WPD-EPQRKPLFADFIPPEQ-----
UPI0001BF7357_347_434 ---LYIKNLMRPLRPDFLRQYLE-ELAPPGLRDPDSV-----Q--DFHLDHIKTHAFV-----SFTSVAAARARVALHGKI-WPN-ERNRKLWVDFIPEPDRV-----
G2Q2J2_296_363        ---ELALPGAALPDDCL-----V--RFYLDQVIRTHAFV-----RFTSVAAASRVRTALHGTW-WPN-ERNRKLWVDFVPEKVD-----
G9MZ12_257_346        ---AIYISNLMRPLRPDDLQNHV-SLATHDSNKGDAT-----A--RFYLDQIRTHAFV-----AFDSVATQQRV'TALHDTW-WPN-ESNRKALSDFIPEPERVD-----
AOA084RLV5_298_387    ---ALYISNLMRPLRPQDVRDHL-SLATRPGDFINDDVI-----S--NFFLDQIRTHAFV-----VDSVYASRVRTALHAHV-WPN-ESNRKALWDFVPEEKVD-----
G1XC72_440_495        ---TL--E--SIYLDGIKTHCFA-----VFSVQACSRARNGMHGKI-FPN-ERNRVLADYVPEKVD-----
J4WJ00_296_352        ---CVI--V--QFHLQIRTHAFV-----VLSVQAAARVRSKLDHRV-WPN-ESNRKALCVDVFPPEKID-----
AOA225AA89_324_412    ---IYIRNLMRPLQPLNLKNHLL-SLAPAERQPDAEVL-----L--DFFLDSIKTHCFA-----IFDSVSTASRVSRAVHGTW-WPN-ERDRKPLWVDFIPEKVD-----
AOA0K0EYT9_475_542    ---KNVIYINNLTRPFCALQLKAMLQ-VHN-----T-ML--ED--HFHLMDKKSKCIA-----VYKNEEATAISAVLAENK-FPQ--DE-----
AOA090LB46_470_536    ---KNVIYINNLTRPFCALQLKAMLQ-VHN-----T-ML--ED--HFHLMDKKSKCIA-----VYKNEEATAISAVLAENK-FPQ--D-----
AOA0N4Z9Q3_429_495    ---KNVVYINNLTRPFCALQLKAMLQ-SHN-----T-ML--DE--HFYEMDKKSKCVA-----VYRSENAATAICEVLAENK-FPQ--D-----

```
